# Supplementary material
Source: publisher figshare collection journal article supplement (https://acs.figshare.com/ndownloader/files/3625080)
Supplement: Supplementary file 1 [file 3625080]

## Supporting Information

Andresen Eguiluz *et al.*

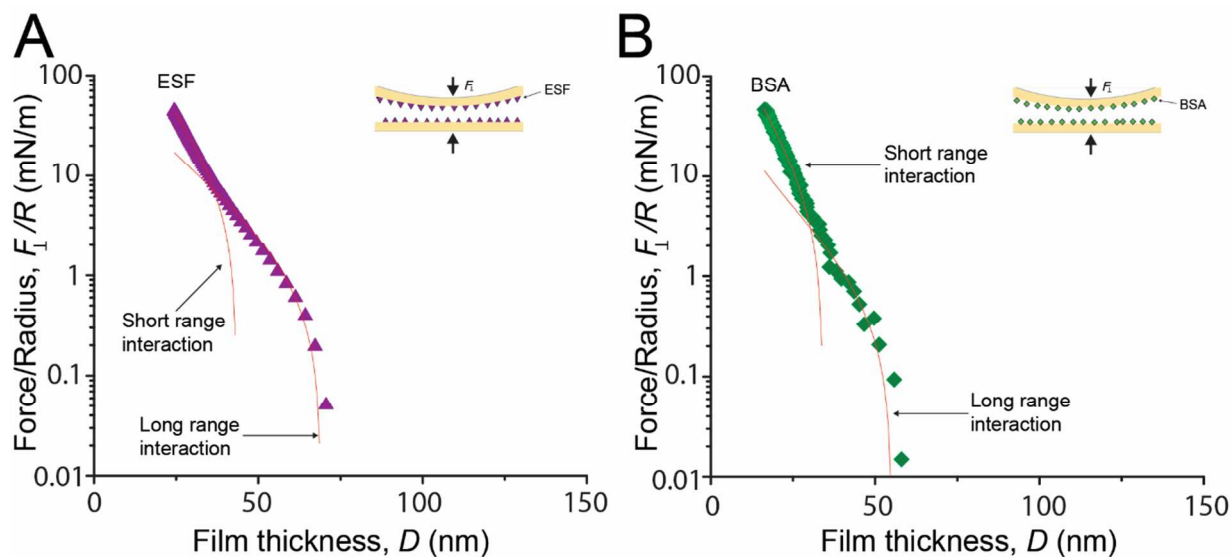

**Figure S1.** Semi-log plots of representative curves of the normal force  $F_{\perp}$  normalized by the surface radius of curvature  $R$  as a function of the film thickness  $D$ . (A) ESF (purple triangles) and (B) BSA (dark green diamonds) adsorbed to mica (no Fn). Red lines indicate AdG fits to Eq. 1 from main text.

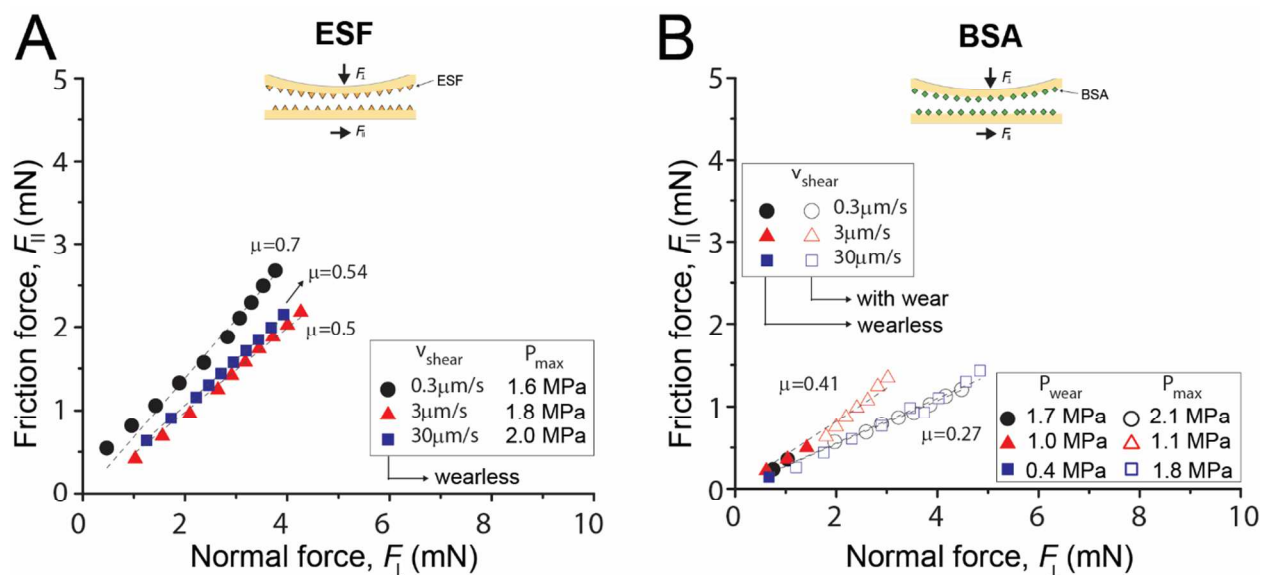

**Figure S2.** Friction force  $F_{\parallel}$  as a function of normal force  $F_{\perp}$  between (A) mica surfaces with adsorbed ESF and (B) with adsorbed BSA sheared in PBS. The surfaces were sheared at sliding velocities of  $v = 0.3 \mu\text{m/s}$  (black circles),  $v = 3 \mu\text{m/s}$  (red triangles), and  $v = 30 \mu\text{m/s}$  (blue squares). Open symbols for BSA indicate measurements after the surfaces became damaged.

Particulate formation and evolution

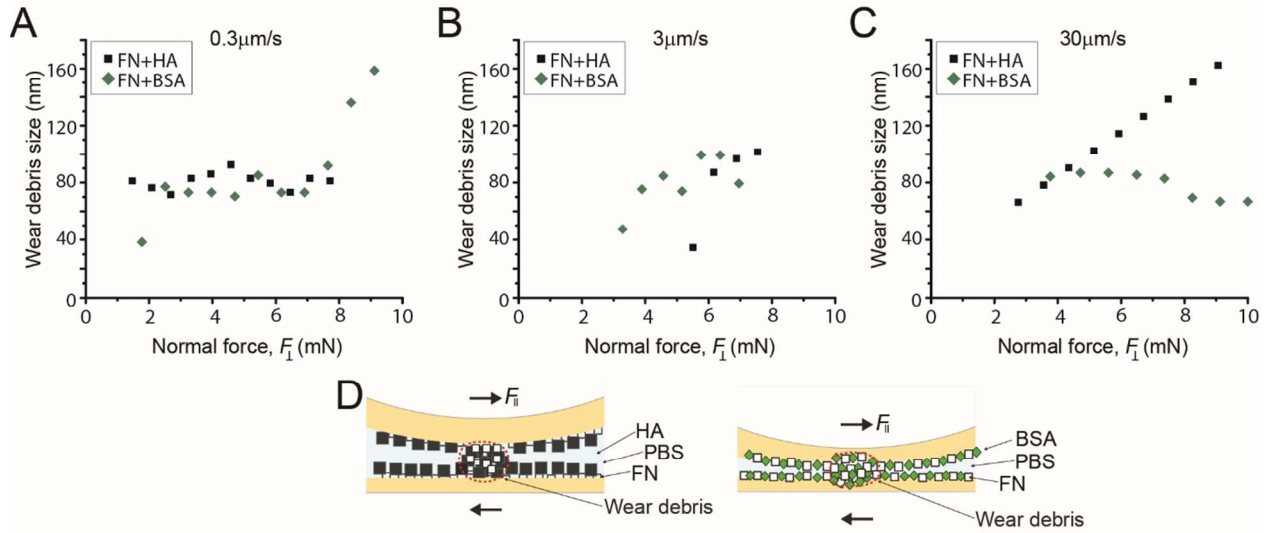

**Figure S3.** Average size of debris measured in the shearing junction as a function of normal force  $F_{\perp}$  at sliding velocities of (A)  $V = 0.3 \mu\text{m/s}$ , (B)  $V = 3 \mu\text{m/s}$ , and (C)  $V = 30 \mu\text{m/s}$  for mica surfaces with adsorbed FN and HA (black squares), and with adsorbed FN and BSA (green diamonds). (D) Schematic representation of FN+HA+mica and FN+BSA+mica debris confined between surfaces. White squares indicate the presence of FN.
